RESEARCH ARTICLE

# Human Gastroenteropancreatic Expression of Melatonin and Its Receptors MT1 and MT2

Fanny Söderquist<sup>1</sup>, Per M. Hellström<sup>2</sup>, Janet L. Cunningham<sup>1\*</sup>

**1** Department of Neuroscience, Psychiatry, Uppsala University, Uppsala, Sweden, **2** Department of Medical Sciences, Gastroenterology/Hepatology, Uppsala University, Uppsala, Sweden

\* [janet.cunningham@neuro.uu.se](mailto:janet.cunningham@neuro.uu.se)

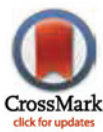

## Abstract

### Background and Aim

The largest source of melatonin, according to animal studies, is the gastrointestinal (GI) tract but this is not yet thoroughly characterized in humans. This study aims to map the expression of melatonin and its two receptors in human GI tract and pancreas using microarray analysis and immunohistochemistry.

### Method

Gene expression data from normal intestine and pancreas and inflamed colon tissue due to ulcerative colitis were analyzed for expression of enzymes relevant for serotonin and melatonin production and their receptors. Sections from paraffin-embedded normal tissue from 42 individuals, representing the different parts of the GI tract (n=39) and pancreas (n=3) were studied with immunohistochemistry using antibodies with specificity for melatonin, MT<sub>1</sub> and MT<sub>2</sub> receptors and serotonin.

### Results

Enzymes needed for production of melatonin are expressed in both GI tract and pancreas tissue. Strong melatonin immunoreactivity (IR) was seen in enterochromaffin (EC) cells partially co-localized with serotonin IR. Melatonin IR was also seen in pancreas islets. MT<sub>1</sub> and MT<sub>2</sub> IR were both found in the intestinal epithelium, in the submucosal and myenteric plexus, and in vessels in the GI tract as well as in pancreatic islets. MT<sub>1</sub> and MT<sub>2</sub> IR was strongest in the epithelium of the large intestine. In the other cell types, both MT<sub>2</sub> gene expression and IR were generally elevated compared to MT<sub>1</sub>. Strong MT<sub>2</sub> IR was noted in EC cells but not MT<sub>1</sub> IR. Changes in gene expression that may result in reduced levels of melatonin were seen in relation to inflammation.

### Conclusion

Widespread gastroenteropancreatic expression of melatonin and its receptors in the GI tract and pancreas is in agreement with the multiple roles ascribed to melatonin, which

## OPEN ACCESS

**Citation:** Söderquist F, Hellström PM, Cunningham JL (2015) Human Gastroenteropancreatic Expression of Melatonin and Its Receptors MT1 and MT2. PLoS ONE 10(3): e0120195. doi:10.1371/journal.pone.0120195

**Academic Editor:** Andrzej T Slominski, University of Tennessee, UNITED STATES

**Received:** January 12, 2015

**Accepted:** February 5, 2015

**Published:** March 30, 2015

**Copyright:** © 2015 Söderquist et al. This is an open access article distributed under the terms of the [Creative Commons Attribution License](https://creativecommons.org/licenses/by/4.0/), which permits unrestricted use, distribution, and reproduction in any medium, provided the original author and source are credited.

**Data Availability Statement:** The following data sets were used and are freely available: GEO Series GSE9576, GEO series GSE16515, GEO series GSE15471, GEO Series GSE3842, GEO series GSE11223. All other relevant data are within the paper and its Supporting Information files.

**Funding:** This work was funded by grants from Erik, Karin and Gösta Selanders Stiftelse, Stiftelsen Söderström-Königska sjukhemmet (JLC), Märta och Nicke Nasvells fond (JLC), The Swedish Society of Medicine (JLC), and ALF Funds from Uppsala University Hospital (JLC). The funders had no role in

study design, data collection and analysis, decision to publish, or preparation of the manuscript.

**Competing Interests:** The authors have declared that no competing interests exist.

include regulation of gastrointestinal motility, epithelial permeability as well as enteropancreatic cross-talk with plausible impact on metabolic control.

## Introduction

Melatonin is well known as a pineal gland hormone that regulates sleep and circadian rhythm but there is also evidence for additional important regulatory functions [1]. Recent publications indicate that melatonin and its receptors regulate circulating glucose levels via insulin and glucagon secretion [2–4]. In the immune system, melatonin acts as an immunomodulator [5, 6] and both melatonin and its derivatives are powerful antioxidants, acting as scavengers of free radicals [7–9] for example protecting skin from UVR-induced damage [10]. Melatonin has been shown to promote cell survival in normal tissues [11–13], but to have oncostatic effects in various types of cancer [14–17]. While not widely known, it has previously been demonstrated in animal studies that the largest source of melatonin is the gastrointestinal (GI) mucosa [18]. The total amount of GI melatonin is estimated to be 400 times greater than that present in the pineal gland [18].

There are two receptors for melatonin, type 1A (MT<sub>1</sub>) and type 1B (MT<sub>2</sub>), both of which are G-protein coupled with high affinity in the nanomolar range [19]. Melatonin can also bind to retinoid related orphan nuclear hormone receptors (RZR/ROR $\alpha$ ) [20]. Subtypes of this nuclear receptor family display tissue specificity but their function is largely unknown [21]. There is a putative strong-affinity MT<sub>3</sub> binding site that has been identified as a quinone reductase 2 [22], but its exact function, which involves NADP<sup>+</sup>/NADPH redox steps, remains to be determined [23].

In rats, mRNA transcripts of both MT<sub>1</sub> and MT<sub>2</sub> have been detected in the small intestine and colon [24, 25]. The highest expression of MT<sub>1</sub> mRNA was detected in the subepithelial layers (muscularis externa and serosa) of the duodenum while the highest density of MT<sub>2</sub> protein (using immunohistochemistry and western blot) was found in the colon, primarily in the smooth muscle layers [26]. One recent study has demonstrated MT<sub>1</sub> immunoreactivity (IR) in human colon using immunohistochemistry (IHC) [27]. Another study on human duodenum showed melatonin, through MT<sub>2</sub> receptors to be active on intracellular calcium storage [28]. Both rat MIN6 pseudoislets (beta cells) and human islets express mRNAs coding for MT<sub>1</sub> and MT<sub>2</sub> receptors, although human islet MT<sub>2</sub> mRNA expression was low in this study [2]. Thus it seems that the presence of melatonin and its receptors in human GI tract and pancreas has not yet been fully characterized.

Melatonin in the GI tract appears to dampen intestinal motility [29, 30]. Levels of melatonin vary in relation to fasting and food intake. In pinealectomized rats, melatonin levels in the portal vein increase after tryptophan administration [31]. In humans and pigs, levels of melatonin do not follow a circadian rhythm but are elevated after food intake [32]. Short-term fasting in humans for two days reduces nocturnal concentrations of melatonin in serum [33]. In mice, fasting for 24 and 48 hours resulted in increased levels of melatonin in GI tissue, particularly in the stomach [34]. In rats, melatonin has been shown to release bicarbonate secretion and protect the mucosa [35]. Melatonin may also influence other hormones regulating hunger and satiety such as leptin and ghrelin [36, 37].

Our present study aims to localize the presence of melatonin and its receptors, MT<sub>1</sub> and MT<sub>2</sub>, at the cellular level in human GI tract and pancreas, using IHC and microarray expression analysis. This provides a basis for upcoming research on the regulatory function of melatonin in the upper and lower GI tract in man.

## Materials and Methods

### Ethics

The study was approved by the Regional Ethics Committee in Uppsala (Number: 2007/143, with decisions 2007-06-13 and 2012-09-14). Written informed consent was obtained for material collection but not this specific study on normal tissue as the data were analyzed anonymously with the purpose of method development and samples cannot be traced back to individuals. The Regional Ethics Committee waived the need for consent in this case in accordance with Swedish law.

### Microarray expression analysis

From the public gene expression data archive Gene Expression Omnibus (GEO) [38], raw data in the form of CEL-files from small intestinal epithelium GEO Series GSE9576 [39] and from human pancreas from the GEO Series GSE16515 [40] (n = 16) and GSE15471 [41] (n = 39) were extracted. The data in GSE9576 is based on RNA from immunolaser capture microdissected cells derived from three snap frozen histopathologically normal small intestinal epithelium specimens sectioned 10  $\mu\text{m}$  thick and labeled with chromogranin A, where it is estimated that 25% of the captured cells are endocrine [39]. The data in GSE16515 and GSE15471 are histopathologically normal whole pancreas tissue from persons with pancreatic cancer [40, 41]. The normal samples from the above-mentioned datasets, all run on the same microarray platform “Affymetrix Human Genome U133 Plus 2.0 Array” (GEO Accession GPL570), were imported into Expression Console provided by Affymetrix (<http://www.affymetrix.com>). Normalization was performed using the robust multi-array average (RMA) method first suggested by Li and Wong in 2001 [42, 43]. One sample “GSM388111”, from the GEO Series GSE15471, was excluded from further analysis as it failed the housekeeping gene control included on the array. Normalized Log<sub>2</sub> expression signals were finally extracted from Expression Console including annotations.

Moreover the normal pancreatic islet samples from the GEO Series GSE3842 [44] (n = 54), obtained from microarray analysis on the Affymetrix Human Gene 1.0 ST Array (GEO Accession GPL6244), were imported into Expression Console and further normalized as previously described. This data is based on RNA isolated islets from non-diabetic cadaver donors [44].

Further analysis was performed in the statistical computing language R (<http://www.r-project.org>), where the gene expression data for the key enzymes involved in production of melatonin from tryptophan, as well as receptors for serotonin and melatonin were extracted including annotations depicted in S1 and S2 Tables. Expression signals for parathyroid hormone (PTH) were used as a negative control. When the features could not be matched to the probe set ID, as in the case with the latter data set that is provided by a different microarray platform, matching was done based on Gene Symbol. The expression values for each feature were finally averaged for each GEO series separately and the results were visualized in separate plots.

The Linear Models for Microarray Analysis (*limma*) R package on GEO2R (<http://www.ncbi.nlm.nih.gov/geo/info/geo2r.html>) was used in order to find differentially expressed between colon biopsies from UC patients (inflamed) and healthy controls (not inflamed) from the GEO series GSE11223 [45]. A difference in gene expression exceeding log<sub>2</sub> fold change (logFC)  $\pm 0.6$  was regarded as an indication of at least 50% up- or down-regulation. Only the samples obtained from the ascending, descending and sigmoid part of the colon were used. A box plot of the value distribution was constructed in order to check that the data is median-centered across the samples, which generally suggests that the data is normalized and cross-comparable. Statistical analysis of differences in expression levels were performed within data sets using two-tailed unpaired t test.

## Histology

**Control tissues.** Human tissue, representing different parts of the GI tract, was obtained from resection tissue margins removed from adult patients during surgery for malignancies; the margins were located at least 2 cm away from the neoplasm. Only tissue with normal macro- and microscopic morphological appearance were included in the study. The identity and their clinical data of the patients are not known and are not included in the analysis. Material from the GI tract of 39 individuals and from the pancreas of 3 individuals. (17 purchased from Asterand, Detroit, MI, USA and 25 from the Department of Pathology, Uppsala University Hospital, Uppsala, Sweden). Positive controls for MT<sub>1</sub> and MT<sub>2</sub> were performed on tissues from skin (2) (obtained from the Department of Immunology, Genetics and Pathology, Uppsala University Hospital) were studied.

**Immunohistochemistry and microscopic assessments.** Tissue specimens were fixed in 4% buffered formalin for 1–2 days, dehydrated, and embedded in paraffin wax. Sections, 4  $\mu$ m thick, were attached to positively charged glass superfrost slides (Menzel-Gläser, Braunschweig, Germany). Sections were deparaffinized in xylene and rehydrated using decreasing concentrations of ethanol to distilled water. Antigen retrieval was performed using pressure cooker treatment for 10 minutes in citrate buffer pH 6. For MT<sub>1</sub>, sections were incubated for 30 minutes in 0.1% H<sub>2</sub>O<sub>2</sub> to quench endogenous peroxidase, washed in phosphate-buffered saline (PBS), and then incubated with normal horse serum diluted 1:5 for 30 minutes. (Vector Laboratories, Burlingame, CA, USA). The sections were then incubated overnight at 4°C with a polyclonal goat anti-human MT<sub>1</sub> antibody (Anti-MTR-1A, (N-20), sc13179, Santa Cruz Biotechnology, Dallas, Texas, USA diluted 1:500). Sections were washed thrice in PBS and then incubated with biotinylated horse anti-goat antibody (BA-9500, Vector Laboratories). Thereafter, sections were incubated for 30 minutes with avidin-biotin—horseradish peroxidase (PK-6100, Vectastain Elite ABC kit, Vector Laboratories). Rabbit anti-melatonin (0100–0203 AbD Serotec, Kidlington, UK, diluted 1/500), rabbit anti-melatonin receptor 1B (ABIN122307, Antibodies-online GmbH, Aachen, Germany diluted 1:100) and monoclonal mouse anti-serotonin (Clone 5HT-H209 DAKO Sweden AB, Stockholm, Sweden, diluted 1/100) antibodies were diluted in PBS with 1% bovine serum albumin (BSA). The DAKO EnVision™ systems for rabbit and for mouse (DAKO Sweden AB, Stockholm, Sweden) were used for antibody detection according to the manufacturer's instructions. Diaminobenzidine was used as chromogen. For visualization of nuclei, the sections were counterstained with Mayer's haematoxylin.

The specimens were altogether from 42 patients, 12 from stomach (fundus (n = 1), corpus (n = 5), antrum (n = 3) and pylorus (n = 3)), 11 from small intestine (duodenum (n = 3) and ileum (n = 8)), 3 from appendix, 13 from large intestine (cecum (n = 1), colon (n = 8), rectum (n = 4)) and 3 from pancreas. All specimens were coded and examined by two independent observers (FS and JLC) on two separate occasions. Staining intensity was classified as negative, weak, medium or strong for MT<sub>1</sub> and MT<sub>2</sub> and the cellular and intracellular localization was documented. The evaluators were in agreement in 92% of the cases. When disagreement occurred sections were reexamined and consensus reached. Sections from skin were used as a positive control for MT<sub>1</sub> and MT<sub>2</sub>. Differences between melatonin expression in the different parts of the gastrointestinal tract was tested with the Kruskal-Wallis Test and the Mann Whitney was used as a post-hoc test.

**Double immunofluorescence.** For double immunofluorescence staining, sections were prepared as described above and then incubated overnight at 4°C with a cocktail of two primary antibodies (dilutions were as follows: anti-MTR-1A at 1:50, anti-melatonin receptor 1B at 1:50, anti-serotonin 1:50, anti-melatonin at 1:100). Before application of the antibody cocktail, the sections were incubated with a non-immune serum from the animal species producing the

secondary antibody, diluted 1:10 in PBS with 1% BSA. The secondary antibodies used were: tetramethyl rhodamine isothiocyanate (TRITC)-conjugated rabbit anti-goat TRITC (Alexa 555 A 21431) fluorescein isothiocyanate (FITC)-conjugated goat anti-mouse (Alexa 488 A 11001) TRITC-conjugated goat anti-rabbit (Alexa 555 A 21428) and FITC-conjugated rabbit anti-mouse (Alexa 488 A 11059) all from Life Technologies Europe BV (Stockholm, Sweden). The incubation time for the secondary antisera was 30 minutes at room temperature. The sections were examined in a Zeiss 510 confocal microscope and photographed with an AxioCam camera employing ZEN 2012 imaging software (Carl Zeiss AB, Stockholm, Sweden) and a 40X plan-apochromat objective. Co-localization studies were performed on tissue sections from the pylorus ( $n = 2$ ) and ileum ( $n = 2$ ).

**Antibody specificity tests.** A neutralization test was performed for melatonin antibodies using saturated (0.1 mg/mL) solutions of melatonin and serotonin (0.1 mg/mL) in PBS with 1% BSA. Specificity tests were performed for the MT<sub>1</sub> and MT<sub>2</sub> antibodies using IHC. Control immunostaining included omission of the primary antisera, and replacement of the primary antibody by non-immune serum at the same dilution as the primary antibody in question and in the same diluent. A neutralization test was conducted by means of 24-hour incubation of primary antiserum with the relevant antigen (sc-13179P, Santa Cruz Biotechnology, Dallas, Texas, USA and SP4391CP, 10 nmol antigen per mL, diluted 1:100 antibody solution) before application to the sections.

## Results

### Microarray expression analysis

Gene expression data for key enzymes in tryptophan metabolism as well as for serotonin and melatonin receptors were analyzed in data from small intestine epithelium enriched for enterochromaffin cells, whole pancreas and pancreatic islets (see [S1](#) and [S2](#) Tables). The data distribution, visualized with a histogram, showed that expression ( $\log_2$ ) < 3 provided an indication of very low or absent expression. Additionally, RNA levels of PTH were used as a negative control (see [Fig. 1](#)).

In the samples from small intestine, tryptophan hydroxylase 1 (TPH1) and DOPA decarboxylase (DDC) were expressed and DCC levels were very high ( $\log_2$ expression >10). Gene expression of the enzymes needed for the production of melatonin from serotonin, arylalkylamine N-acetyltransferase (AANAT) and acetylserotonin O-methyltransferase (ASMT or HIOMT) were present. Both of the melatonin receptors were expressed with MT<sub>2</sub> expression higher than of MT<sub>1</sub> ( $p = 0.0003$ ) in small intestinal mucosa, as found also with IHC analysis (see below).

Two sets of data from normal whole pancreas were analyzed with nearly identical results. TPH1 expression was generally low but there were some individuals with elevated levels, while DDC expression was high in all cases. AANAT and ASMT were present but at low levels. MTNR1A (MT<sub>1</sub>) and MTNR2B (MT<sub>2</sub>) were expressed at levels comparable to those of the small intestine. The levels of MTNR2B exceeded levels of MTNR1A in both data sets ( $p < 0.0001$ ).

In pancreatic islets, the expression patterns for TPH1 and DDC resembled those of whole pancreas. AANAT, MTNR1A and MTNR2B were all expressed at similar levels, data for TPH2 and ASMT was not available in this set. Levels of MTNR2B were higher than for MTNR1A ( $p = 0.02$ ).

Tryptophan hydroxylase 2 (TPH2) is a neuronal isozyme of TPH1. The expression of TPH2 was very low or absent in the small intestine and whole pancreas. Tryptophan 2,3-dioxygenase (TDO2), indolamine 2,3-dioxygenase 1 and 2 (IDO1 and IDO2) catalyze the first and rate-limiting step of the kynurenine pathway. TDO2 was expressed in both the small intestine (mucosal

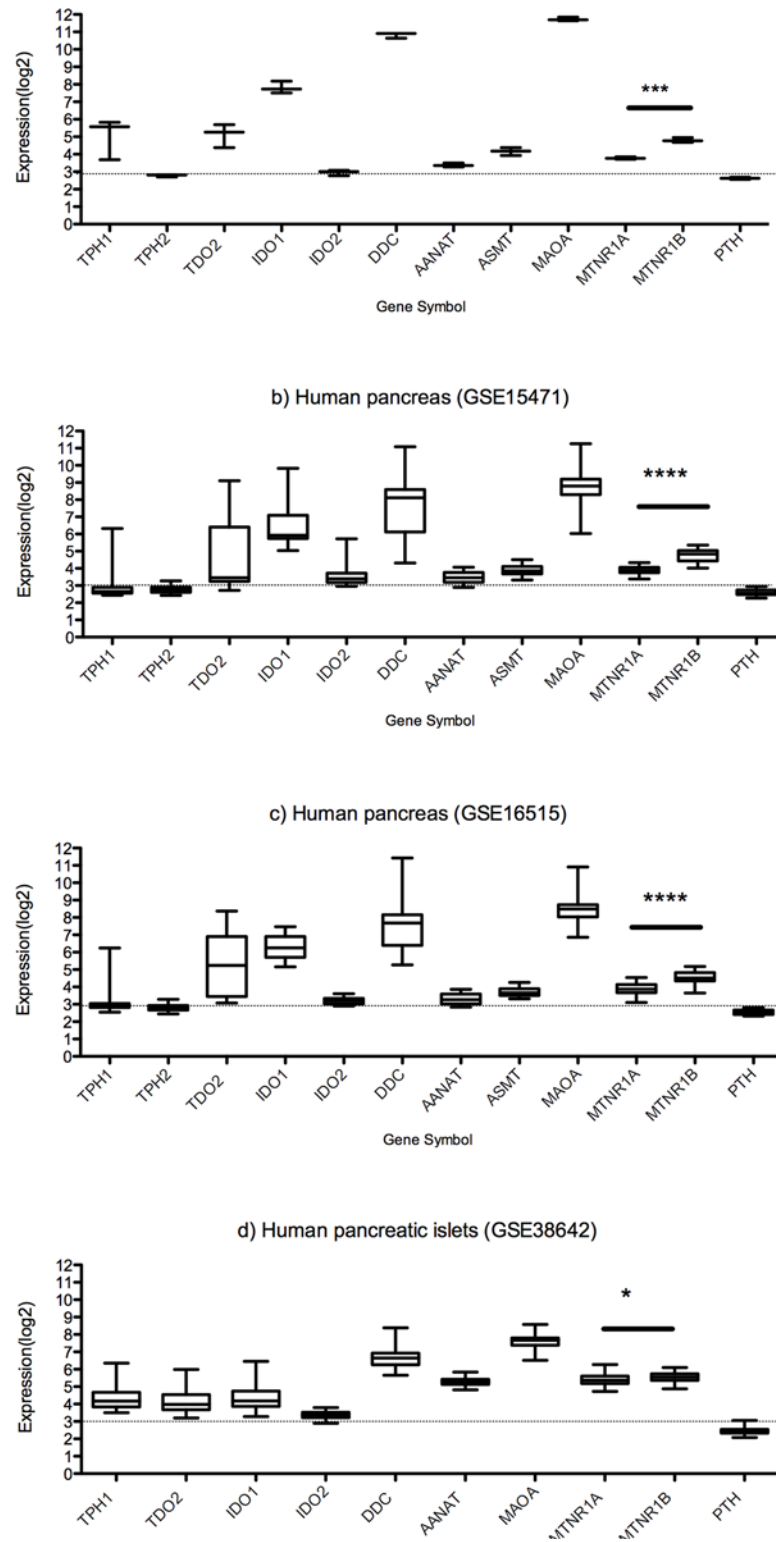

**Fig 1. Normalized gastropancreatic gene expression data (log<sub>2</sub>) for key enzymes in tryptophan serotonin and melatonin metabolism and receptors for melatonin and serotonin.** a) Human small intestinal epithelium (GSE9576) b) Human pancreas (GSE15471) c) Human pancreas (GSE16515) d) Human pancreatic islets (GSE38642). MT<sub>2</sub> expression levels exceed MT<sub>1</sub> levels in small intestine, whole pancreas and islets. (\* p<0.05, \*\*\* p<0.001, \*\*\*\* p<0.0001).

doi:10.1371/journal.pone.0120195.g001



cells enriched for endocrine cells) and in pancreatic islets at the same level as TPH1, while IDO1 levels exceeded TPH1 levels in small intestine ( $p = 0.02$ ) and were similar as TPH1 in pancreatic islets. IDO2 levels were low in the tissues studied.

When inflamed tissue from ulcerative colitis was compared to controls regarding gene expression of enzymes for melatonin synthesis and its receptors, no difference in gene expression exceeding 1.5X ( $\log_2$  fold change  $\pm 0.6$ ) was observed (see [Table 1](#)). The largest difference observed in the gene set was for TDO2 ( $\log_{FC} 0.22$ ,  $p < 0.01$ ), IDO1 ( $\log_{FC} 0.38$ ,  $p = 0.0004$ ) and DDC ( $\log_{FC} -0.19$ ,  $p = 0.000004$ ).

## Histology

Immunoreactive cells for melatonin and its receptors were found throughout the GI tract and pancreas. Staining with melatonin, MT<sub>1</sub> and MT<sub>2</sub> antibodies were completely blocked by preincubation with the respective antigens. Preincubation with serotonin partially blocked the melatonin immunostaining.

Intense melatonin IR was seen in enterochromaffin (EC) cells (See [Table 2](#)). In the stomach, five sections displayed plentiful EC cells with distinct serotonin and melatonin IR. Sections negative for serotonin also lacked melatonin. Throughout the remaining GI-tract numerous EC cells with distinct IR (see [Fig. 2G-I](#)) were identified. Co-localization studies showed that melatonin IR was diffusely spread in the cytoplasm and only partially co-localized with serotonin IR (see [Fig. 3A-C](#)). In a small fraction of EC cells, melatonin IR was much stronger than serotonin IR. Diffuse melatonin IR was found in the absence of serotonin IR in the cytoplasm of surface columnar epithelium in both mucus-producing cells (mucous neck cells and goblet cells) and columnar enterocytes with weak intensity in few cases from the stomach, and small intestine. In contrast, epithelial expression was stronger in all but one case from the large intestine (see [Fig. 2I](#)). Melatonin IR was found in the cytoplasm of mononuclear immune cells in the lamina propria. Finally, strong melatonin IR was discovered in a majority of the endocrine cells in the pancreatic islets (3/3) (see [Fig. 2J](#)) while serotonin IR was absent.

MT<sub>1</sub> IR was found primarily in the cytoplasm of epithelium in both mucus-producing cells (mucous neck cells and goblet cells) and columnar enterocytes (see [Fig. 2A](#) and [Table 2](#)). Weak to medium MT<sub>1</sub> IR was found in the stomach (7/12), small intestine (7/11) and appendix (3/3) (see [Fig. 2A, C and E](#)). The most intense MT<sub>1</sub> IR was observed in the epithelium of the large intestine where all sections were positive. No relationship between EC cells and MT<sub>1</sub> IR was seen. Weak MT<sub>1</sub> receptor IR was rarely found in the submucosal plexus of the small intestine (1/10) or the appendix (1/3), and was found more often in the large intestine (8/13). Weak MT<sub>1</sub> receptor IR was noted in the myenteric plexus in the small intestine (5/9), in the appendix (2/3) and in the large intestine (9/13) (see [Fig. 3E](#)). Smooth muscle cells were negative for the MT<sub>1</sub> IR. In vascular structures, weak MT<sub>1</sub> IR was seen in endothelial cells in the distal parts of the GI tract; the appendix (3/3) and the large intestine (12/13) (see [Fig. 3G](#)). EC cells were negative for MT<sub>1</sub> IR (see [Fig. 4D-F](#)). In pancreatic tissue, MT<sub>1</sub> IR varied. In one case, strong IR was found in a subset of cells in pancreatic islets and weaker IR was seen in pancreatic acini (see [Fig. 2K](#)). The remaining two cases were negative.

MT<sub>2</sub> IR was most prominent in the epithelium, localized to nuclei as well as cytoplasm of enterocytes throughout the GI tract, with the strongest IR in the large intestine (see [Fig. 3B](#) and [Table 2](#)). Additionally, all sections from the small and large intestine and 5 of 12 gastric sections showed cytoplasmic MT<sub>2</sub> staining of endocrine cells in the crypts (see [Fig. 2B, D and F](#)). Negative gastric sections were also negative for serotonin IR. Co-localization studies verified MT<sub>2</sub> IR and serotonin IR, a marker for EC cells, in the same cells but in different cytoplasmic compartments (see [Fig. 4G-I](#)). Cells positive for serotonin IR but negative for MT<sub>2</sub> receptor IR

**Table 1. Data from GEO series GSE11223 was analyzed using the limma R package on GEO2R in order to find differentially expressed genes between colon biopsies from UC patients (inflamed) and healthy controls (not inflamed).**

| Gene symbol | ID           | logFC        | P-value         | Adjusted P-value   |
|-------------|--------------|--------------|-----------------|--------------------|
| TPH1        | 3964         | 0,01         | 0,744000        | 0,824000           |
| TPH2        | 39781        | 0,07         | 0,186000        | 0,304000           |
| TPH2        | 39781        | 0,07         | 0,186000        | 0,304000           |
| <b>TDO2</b> | <b>29668</b> | <b>0,22</b>  | <b>0,001020</b> | <b>0,006090*</b>   |
| <b>IDO1</b> | <b>13847</b> | <b>0,38</b>  | <b>0,000001</b> | <b>0,000042***</b> |
| <b>DDC</b>  | <b>4223</b>  | <b>-0,19</b> | <b>0,000000</b> | <b>0,000004***</b> |
| AANAT       | 13791        | 0,00         | 0,604000        | 0,715000           |
| ASMT        | 18325        | 0,02         | 0,103000        | 0,195000           |
| MTNR1A      | 27435        | 0,00         | 0,002580        | 0,012300           |
| MTNR1B      | 40793        | -0,01        | 0,449000        | 0,580000           |
| HTR1A       | 20428        | 0,04         | 0,886000        | 0,926000           |
| HTR1B       | 16252        | 0,02         | 0,864000        | 0,911000           |
| HTR1D       | 12629        | 0,04         | 0,025100        | 0,068000           |
| HTR1E       | 31707        | 0,04         | 0,232000        | 0,358000           |
| HTR1E       | 4728         | 0,00         | 0,001100        | 0,006430*          |
| HTR1F       | 2587         | 0,07         | 0,039800        | 0,095500           |
| HTR2A       | 21676        | 0,02         | 0,844000        | 0,897000           |
| HTR2B       | 38243        | 0,00         | 0,169000        | 0,283000           |
| HTR2C       | 25384        | 0,01         | 0,132000        | 0,234000           |
| HTR3A       | 1107         | -0,02        | 0,816000        | 0,878000           |
| HTR3A       | 37312        | 0,04         | 0,874000        | 0,918000           |
| HTR3B       | 11736        | 0,03         | 0,012400        | 0,040100           |
| HTR3C       | 30062        | -0,03        | 0,016100        | 0,048800           |
| HTR3D       | 22905        | 0,02         | 0,130000        | 0,233000           |
| HTR3E       | 9603         | 0,02         | 0,100000        | 0,191000           |
| HTR4        | 13456        | 0,01         | 0,164000        | 0,276000           |
| HTR4        | 636          | -0,02        | 0,095200        | 0,184000           |
| HTR5A       | 6663         | 0,06         | 0,306000        | 0,439000           |
| HTR5A       | 21557        | -0,02        | 0,559000        | 0,677000           |
| HTR6        | 36124        | 0,06         | 0,008660        | 0,030800           |
| HTR7        | 19544        | 0,03         | 0,160000        | 0,271000           |
| HTR7P1      | 33553        | 0,03         | 0,000134        | 0,001280*          |

Genes with logFC > 0.1 are marked in bold typeface and significance is indicated as follows:

- \*p < 0.01,
- \*\*p < 0.005,
- \*\*\*p < 0.0001.

doi:10.1371/journal.pone.0120195.t001

were also noted. Weak MT<sub>2</sub> staining was present in intestinal smooth muscle cells in all sections. Cytoplasmic MT<sub>2</sub> IR was noted in both the submucosal and myenteric plexuses throughout the GI tract (see Fig. 3D and F). A small number of immune cells in the lamina propria also displayed nuclear and cytoplasmic MT<sub>2</sub> receptor IR (see Fig. 3B). MT<sub>2</sub> IR was observed in a subset of cells in the vascular smooth muscle cells of all tissues studied (see Fig. 3H). Strong MT<sub>2</sub> IR was found in a subset of cells in the endocrine pancreas (3/3) and in cells lining the pancreatic ducts, while IR in acinar cells was not seen (see Fig. 2L). Table 2 summarizes the findings for MT<sub>1</sub> and MT<sub>2</sub> in different cell types.



**Table 2. Localization of melatonin (Mel) and receptors (MT<sub>1</sub> and MT<sub>2</sub>) in human gastrointestinal tract and pancreas assessed using immunohistochemistry.**

|                                         | Antibody                                 | IR       | Tissue           |                     |              |                     |          | Significance <sup>3</sup> |
|-----------------------------------------|------------------------------------------|----------|------------------|---------------------|--------------|---------------------|----------|---------------------------|
|                                         |                                          |          | Stomach (a)      | Small intestine (b) | Appendix (b) | Large intestine (c) | Pancreas |                           |
| <b>Number of cases</b>                  |                                          |          | 12               | 11                  | 3            | 13                  | 3        |                           |
| <b>Positive (%)</b>                     | Mel                                      |          | 42               | 100                 | 100          | 100                 | 100      |                           |
|                                         | MT1                                      |          | 58               | 64                  | 100          | 100                 | 33       |                           |
|                                         | MT2                                      |          | 100              | 100                 | 100          | 100                 | 100      |                           |
| <b>Epithelial cells (n)</b>             | Mel                                      | Negative | 9                | 7                   | 3            | 1                   | 0        |                           |
|                                         |                                          | Weak     | 3                | 4                   | 0            | 0                   | 3        |                           |
|                                         |                                          | Strong   | 0                | 0                   | 0            | 12                  | 0        | c>a,b***                  |
|                                         | MT1                                      | Negative | 5                | 4                   | 0            | 0                   | 0        |                           |
|                                         |                                          | Weak     | 5                | 7                   | 3            | 0                   | 1        |                           |
|                                         |                                          | Medium   | 2                | 0                   | 0            | 4                   | 0        |                           |
|                                         | MT2                                      | Strong   | 0                | 0                   | 0            | 9                   | 0        | c>a,b***                  |
|                                         |                                          | Negative | 7                | 4                   | 0            | 0                   | 3        |                           |
|                                         |                                          | Weak     | 0                | 7                   | 2            | 1                   | 0        |                           |
|                                         |                                          | Medium   | 5                | 0                   | 1            | 3                   | 0        |                           |
|                                         |                                          | Strong   | 0                | 0                   | 0            | 9                   | 0        | c>a,b***                  |
|                                         |                                          |          |                  |                     |              |                     |          |                           |
| <b>Endocrine cells (n)</b>              | Mel                                      | Negative | 7 <sup>(2)</sup> | 0                   | 0            | 0                   | 0        |                           |
|                                         |                                          | Weak     | 1                | 0                   | 0            | 0                   | 0        |                           |
|                                         |                                          | Strong   | 4                | 11                  | 3            | 13                  | 3        | c,b>a***                  |
|                                         | MT1                                      | Negative | 12               | 11                  | 3            | 13                  |          |                           |
|                                         |                                          | Medium   | 0                | 0                   | 0            | 0                   | 1        | ns                        |
|                                         | MT2                                      | Negative | 7                | 0                   | 0            | 0                   | 0        |                           |
|                                         |                                          | Medium   | 1                | 0                   | 0            | 0                   | 0        |                           |
|                                         |                                          | Strong   | 4                | 11                  | 3            | 13                  | 3        | c,b>a***                  |
|                                         | <b>Submucosal plexus (n)<sup>1</sup></b> | MT1      | Negative         | 10                  | 9            | 2                   | 5        | na                        |
| Weak                                    |                                          |          | 0                | 1                   | 1            | 8                   |          |                           |
| MT2                                     |                                          | Weak     | 3                | 3                   | 2            | 3                   | na       |                           |
|                                         |                                          | Medium   | 7                | 7                   | 1            | 5                   |          |                           |
|                                         |                                          | Strong   | 0                | 0                   | 0            | 5                   |          | ns                        |
|                                         |                                          |          |                  |                     |              |                     |          |                           |
| <b>Myenteric plexus (n)<sup>1</sup></b> | MT1                                      | Negative | 5                | 4                   | 1            | 4                   | na       |                           |
|                                         |                                          | Weak     | 0                | 5                   | 2            | 9                   |          | c>a*                      |
|                                         | MT2                                      | Weak     | 2                | 4                   | 2            | 1                   | na       |                           |
|                                         |                                          | Medium   | 3                | 6                   | 1            | 8                   |          |                           |
|                                         |                                          | Strong   | 0                | 0                   | 0            | 4                   |          | ns                        |
|                                         |                                          |          |                  |                     |              |                     |          |                           |
| <b>Vasculature (n)<sup>1</sup></b>      | MT1                                      | Negative | 10               | 10                  | 3            | 1                   | 3        |                           |
|                                         |                                          | Weak     | 0                | 0                   | 0            | 12                  | 0        | c>a,b**                   |
|                                         | MT2                                      | Weak     | 4                | 8                   | 1            | 3                   | 2        |                           |
|                                         |                                          | Medium   | 4                | 2                   | 2            | 8                   | 1        |                           |

(Continued)

Table 2. (Continued)

| Antibody IR | Tissue      |                     |              |                     |          | Significance <sup>3</sup> |
|-------------|-------------|---------------------|--------------|---------------------|----------|---------------------------|
|             | Stomach (a) | Small intestine (b) | Appendix (b) | Large intestine (c) | Pancreas |                           |
| Strong      | 2           | 0                   | 0            | 2                   | 0        | ns                        |

Melatonin, MT<sub>1</sub> and MT<sub>2</sub> IR was strongest in the large intestine epithelium. At all levels of the gastrointestinal tract, the percentage of MT<sub>2</sub>-positive epithelial cells varied greatly between cases (from 5% to >75). Melatonin and MT<sub>2</sub> and immunoreactivity (IR) is found in endocrine cells in the gut and pancreas. These cells are most plentiful in the small and large intestine. Melatonin IR was not assessed for plexus and vasculature. Nerve and vascular tissue showed both MT<sub>1</sub> and MT<sub>2</sub> IR although this was more frequent and stronger for MT<sub>2</sub>. Numbers of individuals where tissues were available for assessment is indicated under N. Percentage of individuals where tissue showed IR and the tissue type where IR was found is indicated (n). “na”: not applicable

<sup>1</sup>Shown for cases where sufficient tissue was available for evaluation.

<sup>2</sup>Serotonin IR is also negative for these sections.

<sup>3</sup>Differences between expression in stomach (a), small intestine and appendix (b) and large intestine (c). Significance tested with the Kruskal-Wallis Test and the Mann Whitney U Test was used as a post-hoc test,

\*p<0.05,

\*\*p<0.005,

\*\*\*p<0.0001,

ns = not significant.

doi:10.1371/journal.pone.0120195.t002

## Discussion

Animal studies have established the presence of melatonin in the GI tract. Little data on human GI tract and pancreas is available. A limitation of our study and a general problem for many studies of human tissue is that histologically normal tissue is usually not obtained from healthy persons. In this study, tissue was obtained during surgery after standardized fasting or from cadavers, which may influence the expression of hormones and their receptors.

In the tissue, l-tryptophan is converted to serotonin with enzymes TPH1 (or TPH2 in neuronal cells) and DDC. Melatonin is then synthesized from serotonin through two enzymatic steps, AANAT and ASMT. It is, therefore, not surprising that melatonin was found throughout the gut. Our analysis of gene expression data show that AANAT and ASMT are expressed in the small intestine epithelial cells enriched for endocrine cells. The Human Protein Atlas also verified positive IHC staining for AANAT throughout the GI tract (<http://www.proteinatlas.org/ENSG00000129673-AANAT/tissue>) [46]. Interestingly, AANAT staining is located in the glandular cells of the mucosa and not restricted to endocrine cells. The lower expression levels for AANAT compared with ASMT (p = 0.0055) is in agreement with the indication that AANAT was the rate-limiting enzyme for melatonin production and ASMT catalyzing the final reaction in the synthesis of melatonin. The antibody against melatonin also displayed partial IR for N-acetyl serotonin (<0.01%). Hence, we cannot exclude the possibility of false positive melatonin IR in cells producing serotonin. This potential confounder was minimized through co-localization studies where the subcellular localizations for serotonin and melatonin only partially overlap (see Fig. 3A-C). Another indication that this finding is true was the presence of EC cells where IR to melatonin greatly exceeded that to serotonin.

A large number of EC cells throughout the GI tract also displayed MT<sub>2</sub> IR. This is a different finding from that found in the rat intestine where MT<sub>2</sub> immunolabeling was expressed predominantly within the muscular layers but not in the mucosa [26]. Co-localization studies with serotonin showed MT<sub>2</sub> receptor IR to be present in the cytoplasm in separate locations. MT<sub>1</sub> receptor IR was generally not seen in EC cells, which is possibly due to periodicity in MT<sub>1</sub>

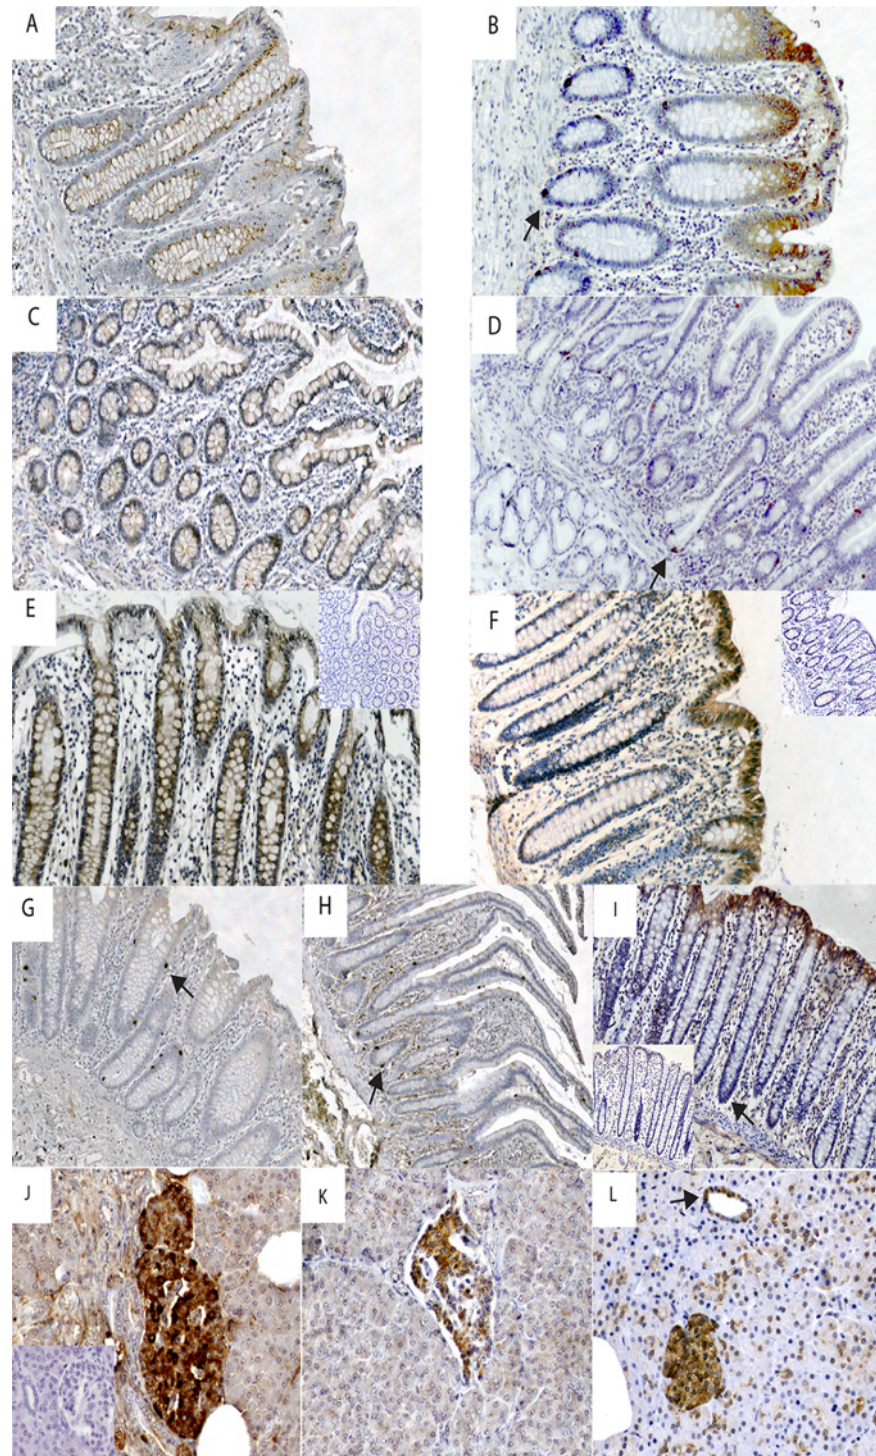

**Fig 2. Immunohistochemical staining of gastrointestinal tract and pancreas tissue with antibodies against melatonin and receptors MT<sub>1</sub> and MT<sub>2</sub>.** A) Strong MT<sub>1</sub> receptor immunoreactivity (IR) in epithelium in pyloric mucosa. B) Strong MT<sub>2</sub> receptor IR in epithelium and endocrine cell (arrow) in pyloric mucosa. C) Weak MT<sub>1</sub> receptor IR in epithelium in ileal mucosa. D) MT<sub>2</sub> receptor IR is negative in epithelial cells but strong in endocrine cells (arrow) in duodenal mucosa E) Strong MT<sub>1</sub> receptor IR in epithelium of colon mucosa. Insert shows neutralization test for MT<sub>1</sub>. F) Strong MT<sub>2</sub> receptor IR in epithelium and endocrine cells (arrow) in colon mucosa. Insert shows neutralization test for MT<sub>2</sub>. G) Strong melatonin IR in endocrine cells in pyloric mucosa. H) Strong melatonin IR in endocrine cells in ileal mucosa. I) Strong melatonin IR in epithelial



cells and endocrine cells in colon mucosa. Insert shows neutralization test for melatonin. A-I: Magnification 100X. J) Strong melatonin IR in endocrine cells in pancreatic islets. Inset shows negative serotonin IR. K) Strong MT<sub>1</sub> receptor IR in endocrine cells in pancreatic islets. L) Strong MT<sub>2</sub> receptor IR in endocrine cells in pancreatic islets and pancreatic ducts. (J-K: Magnification 200X).

doi:10.1371/journal.pone.0120195.g002

receptor expression as described for MT<sub>1</sub> in the brain, where cAMP levels stimulates MT<sub>1</sub> up-regulation and melatonin stimulates MT<sub>1</sub> down-regulation [47–50].

Melatonin is a fat-soluble compound that easily crosses cell membranes and the blood-brain barrier. Melatonin is not thought to be stored in cells upon production [18] but rather immediately released. In the intestine, high concentrations of luminal melatonin increase bicarbonate secretion in the duodenum in response to acidic luminal contents via the MT<sub>2</sub> receptor, theoretically protecting the intestinal mucosa [35]. We were therefore expecting staining of MT<sub>2</sub> in the distal duodenal mucosa but this was only found in few. One possible explanation for this may be that proton pump inhibitor medication is commonly administered pre-surgery in order to diminish the risk of aspiration. Thus, a reduced acid load on the mucosa may have affected the expression of duodenal melatonin.

Epithelial melatonin staining was strongest in the colon and rectum. These same sections also displayed very strong epithelial expression of both MT<sub>1</sub> and MT<sub>2</sub> receptors. The MT<sub>1</sub> IR results are in agreement with findings previously described for human colonic mucosa [27]. Recently, it was shown that very high doses of melatonin reduce epithelial paracellular permeability in rats and may prevent deleterious substances such as endotoxins from leaking in and causing inflammation [51]. An alleviating role has been ascribed to melatonin in the elusive interplay between different aggressive and protective factors in experimental colitis [52–54]. We tested the hypothesis that melatonin receptors and enzymes needed for synthesis may be up-regulated in inflammatory bowel disease compared to controls but found no large differences in mRNA expression. We did note small but significant changes in TDO2 (logFC = 0.22,  $p < 0.01$ ), IDO1 (logFC = 0.38,  $p = 0.0004$ ) and DDC (logFC = -0.19,  $p = 0.000004$ ). The cumulative effect of these changes indicates a shift in the tryptophan metabolism towards the kynurenine pathway.

The relationship between GI melatonin and circulating levels in the plasma appears to be bidirectional. It has been demonstrated that circulating melatonin and ingested melatonin accumulate in the GI tract [55, 56]. In the gut, melatonin appears to act as a functional antagonist of serotonin [29] and dampens intestinal motility [30]. Accordingly, we found MT<sub>1</sub> and MT<sub>2</sub> IR in both the submucosal and myenteric plexuses, which have both parasympathetic and sympathetic input. In vascular structures of the gut, weak MT<sub>1</sub> IR was seen in endothelial cells, whereas more distinct MT<sub>2</sub> IR was found in vascular smooth muscle cells. In blood vessels, melatonin activation of MT<sub>2</sub> causes vasodilation, while MT<sub>1</sub> mediates vasoconstriction [57]. There is also evidence that melatonin regulates endothelial permeability permitting leukocyte extravasation in the course of an immune challenge [58]. In support of this, melatonin and the MT<sub>2</sub> receptor were seen in mononuclear cells in the lamina propria. It has been suggested that lymphocytes produce melatonin, which, in an autocrine and paracrine manner, promotes IL-2 production and proliferation of both T-cells and macrophages [58].

Melatonin IR in pancreatic islets was a surprising finding. Generally low TPH1 expression and some individuals with elevated levels, indicates that serotonin production may be regulated on the RNA level in the pancreas. Gene expression of TDO2 and IDO1 were higher in the whole pancreas samples compared to the islets. This finding is supported by data in the Human Protein Atlas where TDO2 and IDO1 are expressed primarily in the exocrine pancreatic tissue (<http://www.proteinatlas.org/ENSG00000151790-TDO2/tissue/pancreas>) and (<http://www.proteinatlas.org/ENSG00000131203-IDO1/tissue/pancreas>).

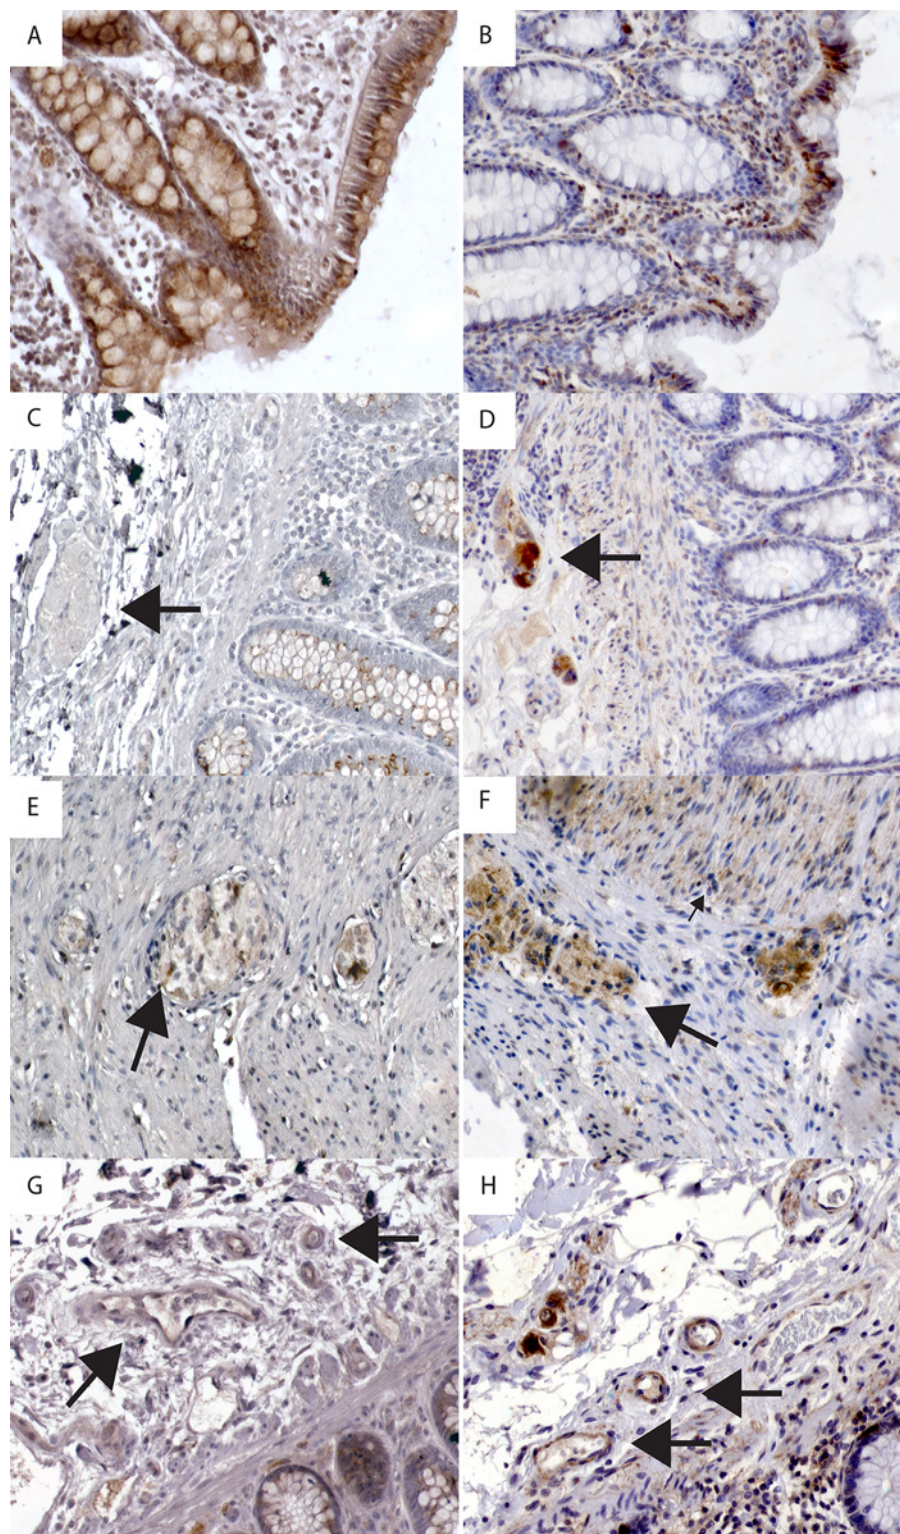

**Fig 3. Immunohistochemical staining of melatonin receptors in specific cell types.** A) Positive melatonin receptor 1 (MT<sub>1</sub>) immunoreactivity (IR) in epithelial cells. B) Melatonin receptor 2 (MT<sub>2</sub>) IR in epithelial cells. C) Arrow indicates negative MT<sub>1</sub> IR in the submucosal plexus. D) Arrow indicates positive MT<sub>2</sub> IR in the submucosal plexus. E) Arrow indicates a cell showing positive MT<sub>1</sub> IR in the myenteric plexus; muscle cells are negative. F) Large arrow indicates positive MT<sub>2</sub> IR in the myenteric plexus, small arrow



indicates positive IR in muscle tissue. G) Large arrow indicates weak MT<sub>1</sub> IR in the endothelium of arterioles and venules. H) Large arrow indicates MT<sub>2</sub> IR in the endothelium and smooth muscle of arterioles and venules. Magnification 200X.

doi:10.1371/journal.pone.0120195.g003

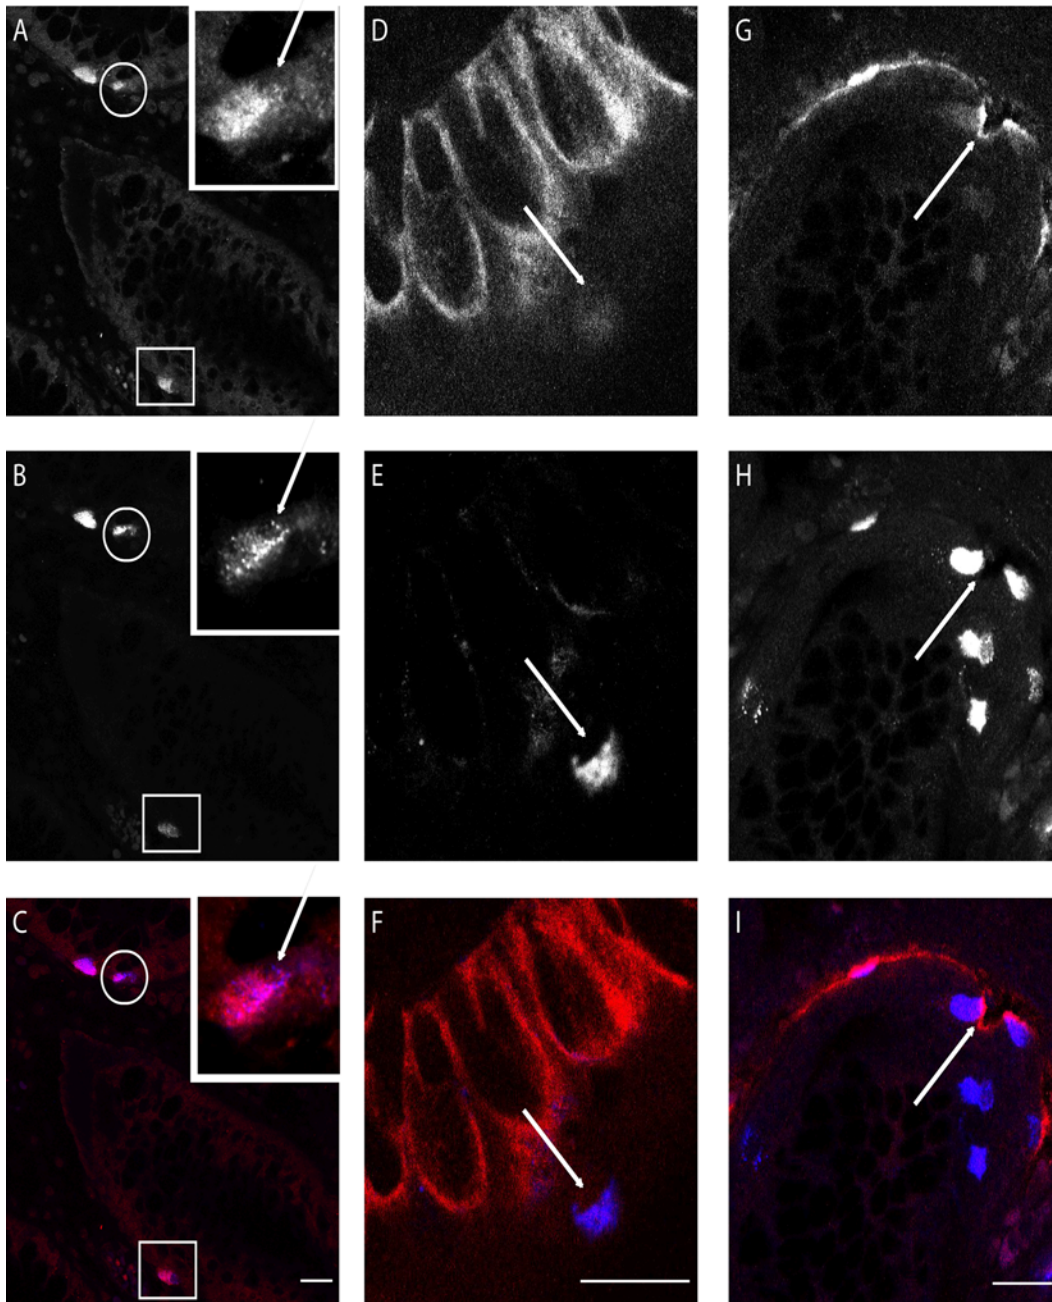

**Fig 4. Confocal images of double immunofluorescence staining of crypts of Lieberkühn in ileum mucosa.** **A:** Melatonin immunoreactive (IR) cells. **B:** Serotonin IR cells. **C:** Merge **A-C**; Inset: magnification of cell in circle. Arrow indicates structures positive for serotonin but not melatonin. Square indicates cell where melatonin IR is strong compared to serotonin IR. **D:** Melatonin receptor MT<sub>1</sub> IR in crypt epithelium. **E:** Serotonin IR cell. **F:** Merge **D-F**; Arrow indicates serotonin IR cell negative for melatonin receptor MT<sub>1</sub>. **G:** Melatonin receptor MT<sub>2</sub> IR. **H:** Serotonin IR cells. **I:** Merge **G-I**; Arrow indicates serotonin IR cell positive for melatonin receptor MT<sub>2</sub>. White bar indicates 20 μm.

doi:10.1371/journal.pone.0120195.g004



Previous studies suggest that melatonin can be produced in pancreas. Gene expression of enzymes involved in the synthesis of melatonin, aralkylamine N-acetyltransferase and N-acetylserotonin O-methyltransferase, have been detected in rat pancreatic acinar cells [59] and human pancreas [60] giving support to our findings. It has also been shown that melatonin can influence transcription factors involved in insulin secretion in the pancreas in a receptor-dependent manner [61]. MT<sub>1</sub> and MT<sub>2</sub> were also demonstrated in pancreatic islets, which is in agreement with melatonin's newly described role in regulating circulating glucose levels via insulin and glucagon secretion [1–3]. The MT<sub>2</sub> IR was found to be the dominant expression, which is a different result than previous studies of mRNA expression in human islets where MT<sub>1</sub> expression was suggested to be higher than MT<sub>2</sub> [2]. Our analyses of pancreas gene expression in three separate data sets performed on two different platforms and our IHC results are in agreement that the MT<sub>2</sub> expression levels exceed MT<sub>1</sub>. Notably, decreased melatonin secretion is reported to increase the risk of developing type 2 diabetes [62], as well as genetic variants of MT<sub>2</sub> that lead to impaired melatonin signaling [63]. MT<sub>1</sub> expression varied from strong to absent in all sections available, and the reason for this variation is not clear.

Our study demonstrates the presence of melatonin and its receptors, MT<sub>1</sub> and MT<sub>2</sub>, throughout the GI tract and in the pancreas. It seems that melatonin signaling may be autocrine, paracrine and/or endocrine and the multiple roles ascribed to it are dependent on organ localization and physiological context. Our results are in agreement with conceivable actions of melatonin, which include regulation of GI motility, epithelial protection, epithelial permeability, vascular function as well as entero-pancreatic endocrine cross-talk with impact on metabolic control. Elucidating the role of melatonin receptors and regulation of their expression may help in understanding the previously described association between disturbances in melatonin signaling in GI and metabolic diseases.

## Supporting Information

**S1 Table. Gene expression data for key enzymes in tryptophan serotonin and melatonin metabolism and receptors for melatonin and serotonin in small intestinal epithelium and pancreas.**

(DOCX)

**S2 Table. Gene expression data for key enzymes in tryptophan serotonin and melatonin metabolism and receptors for melatonin and serotonin in pancreatic islets.**

(DOCX)

## Acknowledgments

The authors thank Åsa Forsberg for her excellent technical assistance and Prof. Bengt Gerdin and Prof. Eva Tiensuu Jansson at Uppsala University for providing work space. We thank Assoc. Prof. Valeria Giandomenico for fruitful scientific discussions. The Science for Life Laboratory BioVis and the Center for Image Analysis provided guidance in confocal imaging and image analysis. The Science for Life Laboratory Array and Analysis Facility provided assistance in the microarray analysis.

## Author Contributions

Conceived and designed the experiments: JLC FS PH. Performed the experiments: JLC FS. Analyzed the data: JLC FS PH. Contributed reagents/materials/analysis tools: JLC. Wrote the paper: JLC FS PH.

## References

1. Slominski RM, Reiter RJ, Schlabritz-Loutsevitch N, Ostrom RS, Slominski AT. Melatonin membrane receptors in peripheral tissues: distribution and functions. *Mol Cell Endocrinol*, 2012. 351(2): p. 152–66. doi: [10.1016/j.mce.2012.01.004](https://doi.org/10.1016/j.mce.2012.01.004) PMID: [22245784](https://pubmed.ncbi.nlm.nih.gov/22245784/)
2. Ramracheya RD, Muller DS, Squires PE, Brereton H, Sugden D, Huang GC, et al. Function and expression of melatonin receptors on human pancreatic islets. *J Pineal Res*, 2008. 44(3): p. 273–9. doi: [10.1111/j.1600-079X.2007.00523.x](https://doi.org/10.1111/j.1600-079X.2007.00523.x) PMID: [18194202](https://pubmed.ncbi.nlm.nih.gov/18194202/)
3. Lyssenko V, Nagorny CL, Erdos MR, Wierup N, Jonsson A, Spegel P, et al. Common variant in MTNR1B associated with increased risk of type 2 diabetes and impaired early insulin secretion. *Nat Genet*, 2009. 41(1): p. 82–8. doi: [10.1038/ng.288](https://doi.org/10.1038/ng.288) PMID: [19060908](https://pubmed.ncbi.nlm.nih.gov/19060908/)
4. Bahr I, Muhlbauer E, Schucht H, Peschke E. Melatonin stimulates glucagon secretion in vitro and in vivo. *J Pineal Res*, 2011. 50(3): p. 336–44. doi: [10.1111/j.1600-079X.2010.00848.x](https://doi.org/10.1111/j.1600-079X.2010.00848.x) PMID: [21244480](https://pubmed.ncbi.nlm.nih.gov/21244480/)
5. Calvo JR, Gonzalez-Yanes C, Maldonado MD. The role of melatonin in the cells of the innate immunity: a review. *J Pineal Res*, 2013. 55(2): p. 103–20. doi: [10.1111/jpi.12075](https://doi.org/10.1111/jpi.12075) PMID: [23889107](https://pubmed.ncbi.nlm.nih.gov/23889107/)
6. Wu CC, Lu KC, Lin GJ, Hsieh HY, Chu P, Lin SH, et al. Melatonin enhances endogenous heme oxygenase-1 and represses immune responses to ameliorate experimental murine membranous nephropathy. *J Pineal Res*, 2012. 52(4): p. 460–9. doi: [10.1111/j.1600-079X.2011.00960.x](https://doi.org/10.1111/j.1600-079X.2011.00960.x) PMID: [22288898](https://pubmed.ncbi.nlm.nih.gov/22288898/)
7. Galano A, Tan DX, Reiter RJ. Melatonin as a natural ally against oxidative stress: a physicochemical examination. *J Pineal Res*, 2011. 51(1): p. 1–16. doi: [10.1111/j.1600-079X.2011.00916.x](https://doi.org/10.1111/j.1600-079X.2011.00916.x) PMID: [21752095](https://pubmed.ncbi.nlm.nih.gov/21752095/)
8. Galano A, Tan DX, Reiter RJ. On the free radical scavenging activities of melatonin's metabolites, AFMK and AMK. *J Pineal Res*, 2013. 54(3): p. 245–57. doi: [10.1111/jpi.12010](https://doi.org/10.1111/jpi.12010) PMID: [22998574](https://pubmed.ncbi.nlm.nih.gov/22998574/)
9. Janjetovic Z, Nahmias ZP, Hanna S, Jarrett SG, Kim TK, Reiter RJ, et al. Melatonin and its metabolites ameliorate ultraviolet B-induced damage in human epidermal keratinocytes. *J Pineal Res*, 2014. 57(1): p. 90–102. doi: [10.1111/jpi.12146](https://doi.org/10.1111/jpi.12146) PMID: [24867336](https://pubmed.ncbi.nlm.nih.gov/24867336/)
10. Slominski AT, Kleszczynski K, Semak I, Janjetovic Z, Zmijewski MA, Kim TK, et al. Local melatonergic system as the protector of skin integrity. *Int J Mol Sci*, 2014. 15(10): p. 17705–32. doi: [10.3390/ijms151017705](https://doi.org/10.3390/ijms151017705) PMID: [25272227](https://pubmed.ncbi.nlm.nih.gov/25272227/)
11. Das A, McDowell M, Pava MJ, Smith JA, Reiter RJ, Woodward JJ, et al. The inhibition of apoptosis by melatonin in VSC4.1 motoneurons exposed to oxidative stress, glutamate excitotoxicity, or TNF-alpha toxicity involves membrane melatonin receptors. *J Pineal Res*, 2010. 48(2): p. 157–69. doi: [10.1111/j.1600-079X.2009.00739.x](https://doi.org/10.1111/j.1600-079X.2009.00739.x) PMID: [20082663](https://pubmed.ncbi.nlm.nih.gov/20082663/)
12. Espino J, Bejarano I, Ortiz A, Lozano GM, Garcia JF, Pariente JA, et al. Melatonin as a potential tool against oxidative damage and apoptosis in ejaculated human spermatozoa. *Fertil Steril*, 2010. 94(5): p. 1915–7. doi: [10.1016/j.fertnstert.2009.12.082](https://doi.org/10.1016/j.fertnstert.2009.12.082) PMID: [20152967](https://pubmed.ncbi.nlm.nih.gov/20152967/)
13. Espino J, Bejarano I, Redondo PC, Rosado JA, Barriga C, Reiter RJ, et al. Melatonin reduces apoptosis induced by calcium signaling in human leukocytes: Evidence for the involvement of mitochondria and Bax activation. *J Membr Biol*, 2010. 233(1–3): p. 105–18. doi: [10.1007/s00232-010-9226-9](https://doi.org/10.1007/s00232-010-9226-9) PMID: [20135104](https://pubmed.ncbi.nlm.nih.gov/20135104/)
14. Martin-Renedo J, Mauriz JL, Jorquera F, Ruiz-Andres O, Gonzalez P, Gonzalez-Gallego J. Melatonin induces cell cycle arrest and apoptosis in hepatocarcinoma HepG2 cell line. *J Pineal Res*, 2008. 45(4): p. 532–40. doi: [10.1111/j.1600-079X.2008.00641.x](https://doi.org/10.1111/j.1600-079X.2008.00641.x) PMID: [19012662](https://pubmed.ncbi.nlm.nih.gov/19012662/)
15. Cucina A, Proietti S, D'Anselmi F, Coluccia P, Dinicola S, Frati L, et al. Evidence for a biphasic apoptotic pathway induced by melatonin in MCF-7 breast cancer cells. *J Pineal Res*, 2009. 46(2): p. 172–80. doi: [10.1111/j.1600-079X.2008.00645.x](https://doi.org/10.1111/j.1600-079X.2008.00645.x) PMID: [19175854](https://pubmed.ncbi.nlm.nih.gov/19175854/)
16. Meliska CJ, Martinez LF, Lopez AM, Sorenson DL, Nowakowski S, Kripke DF, et al. Antepartum depression severity is increased during seasonally longer nights: relationship to melatonin and cortisol timing and quantity. *Chronobiol Int*, 2013. 30(9): p. 1160–73. doi: [10.3109/07420528.2013.808652](https://doi.org/10.3109/07420528.2013.808652) PMID: [23998286](https://pubmed.ncbi.nlm.nih.gov/23998286/)
17. Fan L, Sun G, Ma T, Zhong F, Wei W. Melatonin overcomes apoptosis resistance in human hepatocellular carcinoma by targeting survivin and XIAP. *J Pineal Res*, 2013. 55(2): p. 174–83. doi: [10.1111/jpi.12060](https://doi.org/10.1111/jpi.12060) PMID: [23679681](https://pubmed.ncbi.nlm.nih.gov/23679681/)
18. Bubenik GA. Thirty four years since the discovery of gastrointestinal melatonin. *J Physiol Pharmacol*, 2008. 59 Suppl 2: p. 33–51. PMID: [18812627](https://pubmed.ncbi.nlm.nih.gov/18812627/)
19. Masana MI, Dubocovich ML. Melatonin receptor signaling: finding the path through the dark. *Sci STKE*, 2001. 2001(107): p. pe39. PMID: [11698691](https://pubmed.ncbi.nlm.nih.gov/11698691/)
20. Becker-Andre M, Wiesenberger I, Schaeren-Wiemers N, Andre E, Missbach M, Saurat JH, et al. Pineal gland hormone melatonin binds and activates an orphan of the nuclear receptor superfamily. *J Biol Chem*, 1994. 269(46): p. 28531–4. PMID: [7961794](https://pubmed.ncbi.nlm.nih.gov/7961794/)

21. Smirnov AN. Nuclear melatonin receptors. *Biochemistry (Mosc)*, 2001. 66(1): p. 19–26. PMID: [11240388](#)
22. Nosjean O, Ferro M, Coge F, Beauverger P, Henlin JM, Lefoulon F, et al. Identification of the melatonin-binding site MT3 as the quinone reductase 2. *J Biol Chem*, 2000. 275(40): p. 31311–7. PMID: [10913150](#)
23. Dubocovich ML, Markowska M. Functional MT1 and MT2 melatonin receptors in mammals. *Endocrine*, 2005. 27(2): p. 101–10. PMID: [16217123](#)
24. Sallinen P, Saarela S, Ilves M, Vakkuri O, Leppaluoto J. The expression of MT1 and MT2 melatonin receptor mRNA in several rat tissues. *Life Sci*, 2005. 76(10): p. 1123–34. PMID: [15620576](#)
25. Sotak M, Mrnka L, Pacha J. Heterogeneous expression of melatonin receptor MT1 mRNA in the rat intestine under control and fasting conditions. *J Pineal Res*, 2006. 41(2): p. 183–8. PMID: [16879325](#)
26. Stebelova K, Anttila K, Manttari S, Saarela S, Zeman M. Immunohistochemical definition of MT(2) receptors and melatonin in the gastrointestinal tissues of rat. *Acta Histochem*, 2010. 112(1): p. 26–33. doi: [10.1016/j.acthis.2008.03.004](#) PMID: [19004484](#)
27. Nemeth C, Humpeler S, Kallay E, Mesteri I, Svoboda M, Rogelsperger O, et al. Decreased expression of the melatonin receptor 1 in human colorectal adenocarcinomas. *J Biol Regul Homeost Agents*, 2011. 25(4): p. 531–42. PMID: [22217986](#)
28. Sjoblom M, Safsten B, Flemstrom G. Melatonin-induced calcium signaling in clusters of human and rat duodenal enterocytes. *Am J Physiol Gastrointest Liver Physiol*, 2003. 284(6): p. G1034–44. PMID: [12584110](#)
29. Thor PJ, Krolczyk G, Gil K, Zurowski D, Nowak L. Melatonin and serotonin effects on gastrointestinal motility. *J Physiol Pharmacol*, 2007. 58 Suppl 6: p. 97–103. PMID: [18212403](#)
30. Konturek SJ, Konturek PC, Brzozowska I, Pawlik M, Sliwowski Z, Czesnikiewicz-Guzik M, et al. Localization and biological activities of melatonin in intact and diseased gastrointestinal tract (GIT). *J Physiol Pharmacol*, 2007. 58(3): p. 381–405. PMID: [17928638](#)
31. Huether G. Melatonin synthesis in the gastrointestinal tract and the impact of nutritional factors on circulating melatonin. *Ann N Y Acad Sci*, 1994. 719: p. 146–58. PMID: [8010590](#)
32. Bubenik GA, Pang SF, Cockshut JR, Smith PS, Grovum LW, Friendship RM, et al. Circadian variation of portal, arterial and venous blood levels of melatonin in pigs and its relationship to food intake and sleep. *J Pineal Res*, 2000. 28(1): p. 9–15. PMID: [10626596](#)
33. Rojdmarm S, Wetterber L. Short-term fasting inhibits the nocturnal melatonin secretion in healthy man. *Clin Endocrinol (Oxf)*, 1989. 30(4): p. 451–7. PMID: [2598477](#)
34. Bubenik GA, Ball RO, Pang SF. The effect of food deprivation on brain and gastrointestinal tissue levels of tryptophan, serotonin, 5-hydroxyindoleacetic acid, and melatonin. *J Pineal Res*, 1992. 12(1): p. 7–16. PMID: [1373446](#)
35. Sjoblom M, Flemstrom G. Melatonin in the duodenal lumen is a potent stimulant of mucosal bicarbonate secretion. *J Pineal Res*, 2003. 34(4): p. 288–93. PMID: [12662352](#)
36. Wolden-Hanson T, Mitton DR, McCants RL, Yellon SM, Wilkinson CW, Matsumoto AM, et al. Daily melatonin administration to middle-aged male rats suppresses body weight, intraabdominal adiposity, and plasma leptin and insulin independent of food intake and total body fat. *Endocrinology*, 2000. 141(2): p. 487–97. PMID: [10650927](#)
37. Mustonen AM, Nieminen P, Hyvarinen H. Preliminary evidence that pharmacologic melatonin treatment decreases rat ghrelin levels. *Endocrine*, 2001. 16(1): p. 43–6. PMID: [11822826](#)
38. Barrett T, Wilhite SE, Ledoux P, Evangelista C, Kim IF, Tomashevsky M, et al. NCBI GEO: archive for functional genomics data sets—update. *Nucleic Acids Res*, 2013. 41(Database issue): p. D991–5. doi: [10.1093/nar/gks1193](#) PMID: [23193258](#)
39. Leja J, Essaghir A, Essand M, Wester K, Oberg K, Totterman TH, et al. Novel markers for enterochromaffin cells and gastrointestinal neuroendocrine carcinomas. *Mod Pathol*, 2009. 22(2): p. 261–72. doi: [10.1038/modpathol.2008.174](#) PMID: [18953328](#)
40. Pei H, Li L, Fridley BL, Jenkins GD, Kalari KR, Lingle W, et al. FKBP51 affects cancer cell response to chemotherapy by negatively regulating Akt. *Cancer Cell*, 2009. 16(3): p. 259–66. doi: [10.1016/j.ccr.2009.07.016](#) PMID: [19732725](#)
41. Badea L, Herlea V, Dima SO, Dumitrascu T, Popescu I. Combined gene expression analysis of whole-tissue and microdissected pancreatic ductal adenocarcinoma identifies genes specifically overexpressed in tumor epithelia. *Hepatogastroenterology*, 2008. 55(88): p. 2016–27. PMID: [19260470](#)
42. Irizarry RA, Hobbs B, Collin F, Beazer-Barclay YD, Antonellis KJ, Scherf U, et al. Exploration, normalization, and summaries of high density oligonucleotide array probe level data. *Biostatistics*, 2003. 4(2): p. 249–64. PMID: [12925520](#)
43. Li C, Wong WH. Model-based analysis of oligonucleotide arrays: expression index computation and outlier detection. *Proc Natl Acad Sci U S A*, 2001. 98(1): p. 31–6. PMID: [11134512](#)

44. Taneera J, Lang S, Sharma A, Fadista J, Zhou Y, Ahlqvist E, et al. A systems genetics approach identifies genes and pathways for type 2 diabetes in human islets. *Cell Metab*, 2012. 16(1): p. 122–34. doi: [10.1016/j.cmet.2012.06.006](https://doi.org/10.1016/j.cmet.2012.06.006) PMID: [22768844](https://pubmed.ncbi.nlm.nih.gov/22768844/)
45. Noble CL, Abbas AR, Cornelius J, Lees CW, Ho GT, Toy K, et al. Regional variation in gene expression in the healthy colon is dysregulated in ulcerative colitis. *Gut*, 2008. 57(10): p. 1398–405. doi: [10.1136/gut.2008.148395](https://doi.org/10.1136/gut.2008.148395) PMID: [18523026](https://pubmed.ncbi.nlm.nih.gov/18523026/)
46. Uhlen M, Oksvold P, Fagerberg L, Lundberg E, Jonasson K, Forsberg M, et al. Towards a knowledge-based Human Protein Atlas. *Nat Biotechnol*, 2010. 28(12): p. 1248–50. doi: [10.1038/nbt1210-1248](https://doi.org/10.1038/nbt1210-1248) PMID: [21139605](https://pubmed.ncbi.nlm.nih.gov/21139605/)
47. Ross AW, Webster CA, Thompson M, Barrett P, Morgan PJ. A novel interaction between inhibitory melatonin receptors and protein kinase C-dependent signal transduction in ovine pars tuberalis cells. *Endocrinology*, 1998. 139(4): p. 1723–30. PMID: [9528955](https://pubmed.ncbi.nlm.nih.gov/9528955/)
48. Barrett P, Davidson G, Hazlerigg DG, Morris MA, Ross AW, Morgan PJ. Mel 1a melatonin receptor expression is regulated by protein kinase C and an additional pathway addressed by the protein kinase C inhibitor Ro 31–8220 in ovine pars tuberalis cells. *Endocrinology*, 1998. 139(1): p. 163–71. PMID: [9421411](https://pubmed.ncbi.nlm.nih.gov/9421411/)
49. Lanfumey L, Mongeau R, Hamon M. Biological rhythms and melatonin in mood disorders and their treatments. *Pharmacol Ther*, 2013. 138(2): p. 176–84. doi: [10.1016/j.pharmthera.2013.01.005](https://doi.org/10.1016/j.pharmthera.2013.01.005) PMID: [23348014](https://pubmed.ncbi.nlm.nih.gov/23348014/)
50. Lungwitz E, Gannon RL. Serotonin1A-mediated amplification of light-induced phase advances of circadian rhythms in the Syrian hamster: post-light effects. *Brain Res*, 2009. 1250: p. 157–63. doi: [10.1016/j.brainres.2008.11.010](https://doi.org/10.1016/j.brainres.2008.11.010) PMID: [19041294](https://pubmed.ncbi.nlm.nih.gov/19041294/)
51. Sommansson A, Nylander O, Sjoblom M. Melatonin decreases duodenal epithelial paracellular permeability via a nicotinic receptor-dependent pathway in rats in vivo. *J Pineal Res*, 2012.
52. Tahan G, Gramignoli R, Marongiu F, Aktolga S, Cetinkaya A, Tahan V, et al. Melatonin expresses powerful anti-inflammatory and antioxidant activities resulting in complete improvement of acetic-acid-induced colitis in rats. *Dig Dis Sci*, 2011. 56(3): p. 715–20. doi: [10.1007/s10620-010-1364-5](https://doi.org/10.1007/s10620-010-1364-5) PMID: [20676767](https://pubmed.ncbi.nlm.nih.gov/20676767/)
53. Chojnacki C, Wisniewska-Jarosinska M, Kulig G, Majsterek I, Reiter RJ, Chojnacki J. Evaluation of enterochromaffin cells and melatonin secretion exponents in ulcerative colitis. *World J Gastroenterol*, 2013. 19(23): p. 3602–7. doi: [10.3748/wjg.v19.i23.3602](https://doi.org/10.3748/wjg.v19.i23.3602) PMID: [23801861](https://pubmed.ncbi.nlm.nih.gov/23801861/)
54. Sayyed HG, Jaumdally RJ, Idriss NK, El Sers DA, Blann A. The effect of melatonin on plasma markers of inflammation and on expression of nuclear factor-kappa beta in acetic acid-induced colitis in the rat. *Dig Dis Sci*, 2013. 58(11): p. 3156–64. doi: [10.1007/s10620-013-2811-x](https://doi.org/10.1007/s10620-013-2811-x) PMID: [23925818](https://pubmed.ncbi.nlm.nih.gov/23925818/)
55. Messner M, Hardeland R, Rodenbeck A, Huether G. Tissue retention and subcellular distribution of continuously infused melatonin in rats under near physiological conditions. *J Pineal Res*, 1998. 25(4): p. 251–9. PMID: [9885995](https://pubmed.ncbi.nlm.nih.gov/9885995/)
56. Bubenik GA. Localization, physiological significance and possible clinical implication of gastrointestinal melatonin. *Biol Signals Recept*, 2001. 10(6): p. 350–66. PMID: [11721091](https://pubmed.ncbi.nlm.nih.gov/11721091/)
57. Masana MI, Doolen S, Ersahin C, Al-Ghoul WM, Duckles SP, Dubocovich ML, et al. MT(2) melatonin receptors are present and functional in rat caudal artery. *J Pharmacol Exp Ther*, 2002. 302(3): p. 1295–302. PMID: [12183692](https://pubmed.ncbi.nlm.nih.gov/12183692/)
58. Radogna F, Diederich M, Ghibelli L. Melatonin: a pleiotropic molecule regulating inflammation. *Biochem Pharmacol*, 2010. 80(12): p. 1844–52. doi: [10.1016/j.bcp.2010.07.041](https://doi.org/10.1016/j.bcp.2010.07.041) PMID: [20696138](https://pubmed.ncbi.nlm.nih.gov/20696138/)
59. Jaworek J, Konturek SJ, Tomaszewska R, Leja-Szpak A, Bonior J, Nawrot K, et al. The circadian rhythm of melatonin modulates the severity of caerulein-induced pancreatitis in the rat. *J Pineal Res*, 2004. 37(3): p. 161–70. PMID: [15357660](https://pubmed.ncbi.nlm.nih.gov/15357660/)
60. Jaworek J, Nawrot-Porabka K, Leja-Szpak A, Bonior J, Szklarczyk J, Kot M, et al. Melatonin as modulator of pancreatic enzyme secretion and pancreatoprotector. *J Physiol Pharmacol*, 2007. 58 Suppl 6: p. 65–80. PMID: [18212401](https://pubmed.ncbi.nlm.nih.gov/18212401/)
61. Bazwinsky-Wutschke I, Wolgast S, Muhlbauer E, Albrecht E, Peschke E. Phosphorylation of cyclic AMP-response element-binding protein (CREB) is influenced by melatonin treatment in pancreatic rat insulinoma beta-cells (INS-1). *J Pineal Res*, 2012. 53(4): p. 344–57. doi: [10.1111/j.1600-079X.2012.01004.x](https://doi.org/10.1111/j.1600-079X.2012.01004.x) PMID: [22616931](https://pubmed.ncbi.nlm.nih.gov/22616931/)
62. McMullan CJ, Schernhammer ES, Rimm EB, Hu FB, Forman JP. Melatonin secretion and the incidence of type 2 diabetes. *JAMA*, 2013. 309(13): p. 1388–96. doi: [10.1001/jama.2013.2710](https://doi.org/10.1001/jama.2013.2710) PMID: [23549584](https://pubmed.ncbi.nlm.nih.gov/23549584/)
63. Bonnefond A, Clement N, Fawcett K, Yengo L, Vaillant E, Guillaume JL, et al. Rare MTNR1B variants impairing melatonin receptor 1B function contribute to type 2 diabetes. *Nat Genet*, 2012. 44(3): p. 297–301. doi: [10.1038/ng.1053](https://doi.org/10.1038/ng.1053) PMID: [22286214](https://pubmed.ncbi.nlm.nih.gov/22286214/)
